# Supplementary material for: Double Orifice Mitral Valve and Bicuspid Aortic Valve: Pieces of the Same Single Puzzle?
Source: Case Rep Cardiol. 2015 Apr 9;2015:305142. doi: 10.1155/2015/305142 (PMC4408625; doi:10.1155/2015/305142)
Supplement: Supplementary file 1 — Apical four-chamber view in transthoracic echocardiography showing opening of the double orifice mitral valve is seen in Supplementary Video 1. Video 2 demonstrates opening of the double orifice mitral valve in parasternal short axis view in transthoracic echocardiography. Video 3 shows opening of the bicuspid aortic valve in parasternal short axis view in transthoracic echocardiography. [file 305142.f1.zip]

Archive with 3 entries (3 files):
- Video 1.avi
- Video 2.avi
- Video 3.avi
